# Supplementary material for: The influence of a vegetated bar on channel-bend flow dynamics
Source: Copernicus journal article supplement (doi:10.5194/esurf-6-487-2018), 2018-06-14
Supplement: Supplementary file 1 [file esurf-6-487-2018-supplement.pdf]

Supplement of Earth Surf. Dynam., 6, 487–503, 2018  
<https://doi.org/10.5194/esurf-6-487-2018-supplement>  
© Author(s) 2018. This work is distributed under  
the Creative Commons Attribution 4.0 License.

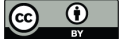

*Supplement of*

## **The influence of a vegetated bar on channel-bend flow dynamics**

**Sharon Bywater-Reyes et al.**

*Correspondence to:* Sharon Bywater-Reyes ([sharon.bywaterreyes@unco.edu](mailto:sharon.bywaterreyes@unco.edu))

The copyright of individual parts of the supplement might differ from the CC BY 4.0 License.

# Supplement

1  
2  
3  
4  
5  
6  
7  
8  
9  
10  
11  
12  
13  
14  
15  
16  
17  
18  
19  
20  
21

## **Channel topography and model grid**

LiDAR was flown by Watershed Sciences, Inc. (now Quantum Spatial) for Missoula County on October 30, 2012 with a Leica ALS60 with 3.83 ground points/m<sup>2</sup>, providing 1-m resolution topography with a RMSE of 0.03 m. Inundated regions (reflected off water) were manually removed. In-channel bathymetry was measured with RTK-GPS cross-section surveys (Trimble R7 and 5800 with Trimble 5700 base station) augmented by Sonarmite echosounder measurements in non-wadeable areas. Monuments used for the LiDAR survey were occupied with the RTK GPS. Horizontal and vertical agreement of < 0.10 m was found. RTK topographic points were interpolated in the downstream direction, as is appropriate in rivers. RTK point density was 1.25 pts m<sup>-2</sup>. All topographic points were combined in iRIC, from which we made a curvilinear orthogonal grid with a centerline following the general pattern of the channel over the model domain with an average cell size of 2.5 by 2.5 m for calibration runs, and 5 by 5 m for the remaining runs, with corresponding 841,851 and 210,926 nodes, respectively. We projected Cartesian coordinate flow solution output to the nearest grid cell of a curvilinear grid (2 by 2 m average grid resolution) covering the channel bend of interest (Figure 3), and converted the associated output to streamwise and stream-normal values with a rotation matrix. A piecewise Cubic Hermite Interpolating Polynomial algorithm was applied to reduce artifacts from the transformation.

22 **Model calibration**

23 We surveyed water surface elevation (WSE) with RTK GPS in at least 30 WSE locations per  
24 calibration over a 180 m reach length for each calibration flow (see main text). The calibrated  
25 runs (Table 1; Fig. S1) had RMSE of 0.11 – to 0.18 m.

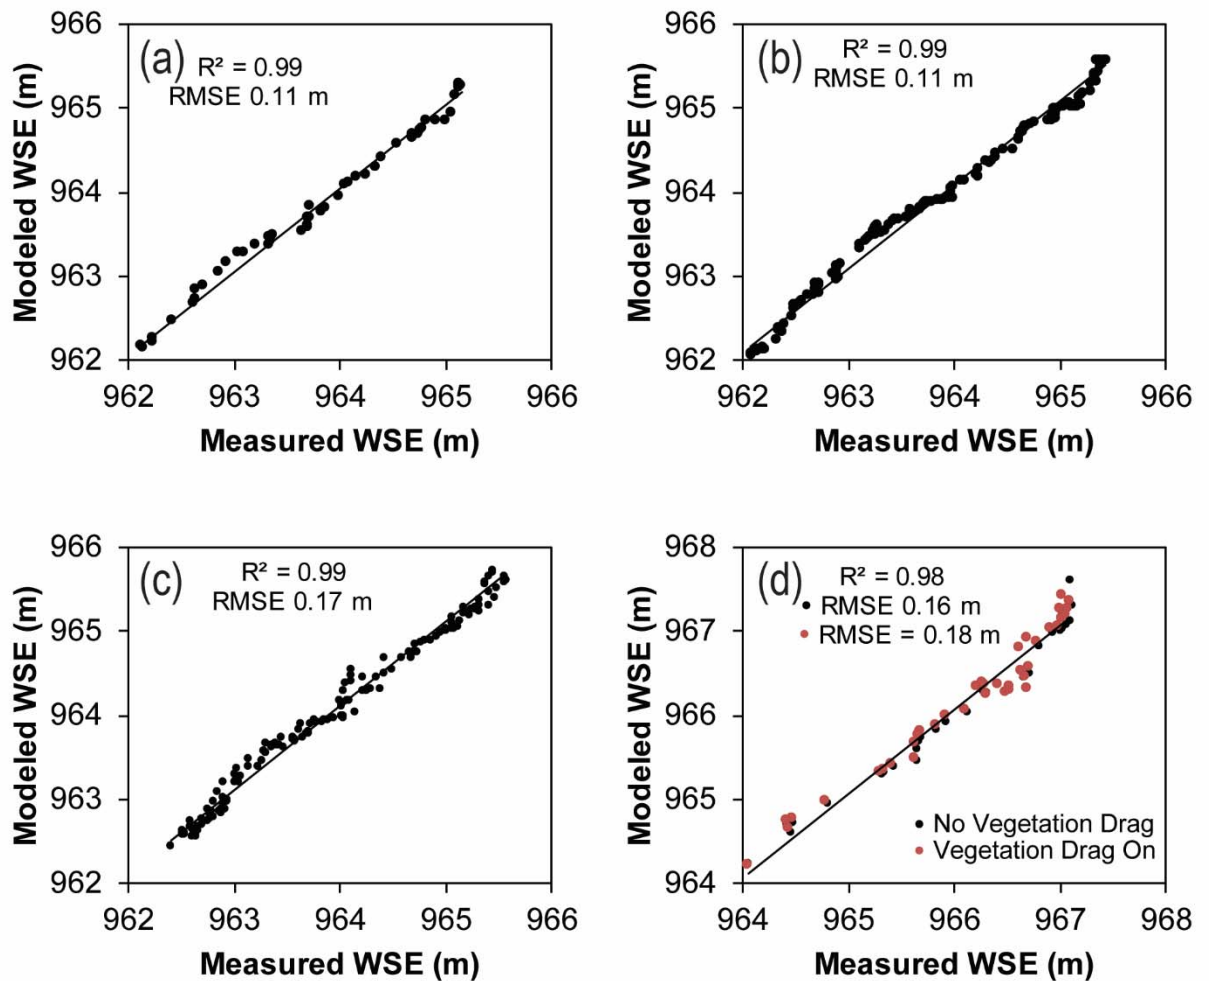

26  
27 **Figure S1. Water surface elevation (WSE) calibration for runs run 1 (a), 2 (b), 3 (c), 4 and 5 (d) (Table 1).**

28  
29 Velocity was measured during base flow in 2015 along cross sections in locations where  
30 little geomorphic change was observed following topography collection (Fig. 1) using a  
31 Teledyne RD Instruments (TRDI) four beam 1200 kHz Rio Grande ADCP mounted to a 12-ft  
32 cataraft equipped with rapid RTK GPS rowed manually. Data were collected using single ping

33 ensembles with Bottom Mode 12 and Water Mode 7, similar to the methods described in Rennie  
 34 and Millar (2004), Rennie and Church (2010), and Venditti et al. (2015). Vertical velocity  
 35 resolution was 0.25 m, with a minimum of four measurements. Velocities from the top 0.5 m and  
 36 bottom 6 % of the depth were excluded. Velocities were corrected for boat speed with WinRiver  
 37 II software using bottom tracking. Bed conditions were immobile, so additional corrections were  
 38 not necessary.

39 Because velocity profiles were incomplete, data were exported in text format from  
 40 WinRiver II, and each ensemble post-processed for depth-averaged velocity ( $\bar{U}$ ) in Matlab  
 41 R2012a by regressing velocity ( $U$ ) as a function of log of height above the bed ( $z$ ) to determine  
 42 shear velocity ( $u^*$ ) and roughness height ( $z_o$ ) (Bergeron and Abrahams, 1992). Since  $U$  varies as  
 43 a function of  $z$ :

$$44 \quad U = \frac{u^*}{\kappa} \ln\left(\frac{z}{z_o}\right) \quad (\text{S1})$$

45 where  $\kappa$  is the von Karman constant (0.41), the regression of  $U$  as a function of  $z$  ( $Uz$ ) yields:

$$46 \quad U = m_{Uz} \ln(z) + c_{Uz} \quad (\text{S2})$$

47 where  $m_{Uz}$  is slope and  $c_{Uz}$  the intercept. Shear velocity,  $u_{*Uz}$ , and roughness height,  $z_{oUz}$ , were  
 48 calculated from the regression coefficients:

$$49 \quad u_{*Uz} = \kappa m_{Uz} \quad (\text{S3})$$

$$50 \quad z_{oUz} = \exp(-c_{Uz}/m_{Uz}) \quad (\text{S4})$$

51 Using the law of the wall and our calculated  $u_{*Uz}$  and  $z_{oUz}$ , we calculated  $\bar{U}$  for each ensemble  
 52 assuming  $z_m = 0.37H$ , where  $H$  is the total depth:

$$53 \quad \bar{U} = \frac{u_{*Uz}}{\kappa} \ln\left(\frac{z_m}{z_{oUz}}\right) \quad (\text{S5})$$

54 Individual ensembles are noisy (e.g., Rennie and Church, 2010) and we wished to  
55 compare measured  $\bar{U}$  to modeled  $\bar{U}$ . Thus we gridded measured velocities to match model  
56 output, ensuring grid cells were concurrent and orthogonal, and calculated the root mean square  
57 error (RMSE). We compared the RMSE of law-of-the-wall-derived  $\bar{U}$  to a simple average  
58 assuming missing values for the top 0.5 m in each ensemble were equal to the value of  $U$   
59 corresponding to the largest  $z$ . Law-of-the-wall-derived  $\bar{U}$  had a lower RMSE, and was thus used  
60 instead of the adjusted average (RMSE  $0.24 \text{ m s}^{-1}$  compared to  $0.33 \text{ m s}^{-1}$ ).

61

## 62 **Floodplain vegetation**

63 Individual floodplain trees were mapped (Fig. 1) from the airborne LiDAR, from which  
64 vegetation density (#stems  $\text{m}^{-2}$ ), height (m) and diameter (m) were extracted. Vegetation points  
65 were isolated and ground vegetation removed with CloudCompare  
66 (<http://www.danielgm.net/cc/>). The dataset was imported as a las dataset in ArcGIS 10.1 and a 1-  
67 m resolution raster of maximum height created. Crowns were mapped following a workflow  
68 similar to Koch et al. (2006) in ArcGIS 10.1, whereby points were inverted and crowns  
69 delineated in a manner similar to delineating drainage basins, and the maximum height for each  
70 crown extracted as “basin” minima. Crown “basins” were converted to polygons. Method  
71 performance was evaluated by comparing crown polygons to aerial imagery. Nearly every tree  
72 large enough to be captured by the LiDAR was accurate (<5 % false positive). Crown attributes  
73 (centroid, area, and radius) were calculated using the field calculator. Height of each crown was  
74 determined by intersecting centroids with the height raster. Diameter at breast height for each  
75 tree was estimated by assuming a crown-diameter to stem-diameter relationship (Hemery et al.,

76 2005). Although this is a rough estimate, results were reasonable (mean diameter at breast height  
77 of  $0.20 \pm 0.14$  m standard deviation).

78         Vegetation polygons were created by constructing a 15-m bounding polygon. The  
79 polygons were smoothed, gaps removed, and dissolved into a single polygon for each region.

80 Average polygon attributes were calculated (vegetation density (#stems  $\text{m}^{-2}$ ), height (m),  
81 diameter (m), and  $A_C$  (average flow depth multiplied by average diameter at breast height;  $\text{m}^2$   
82 per plant).

83

84 **Supplemental results figures**

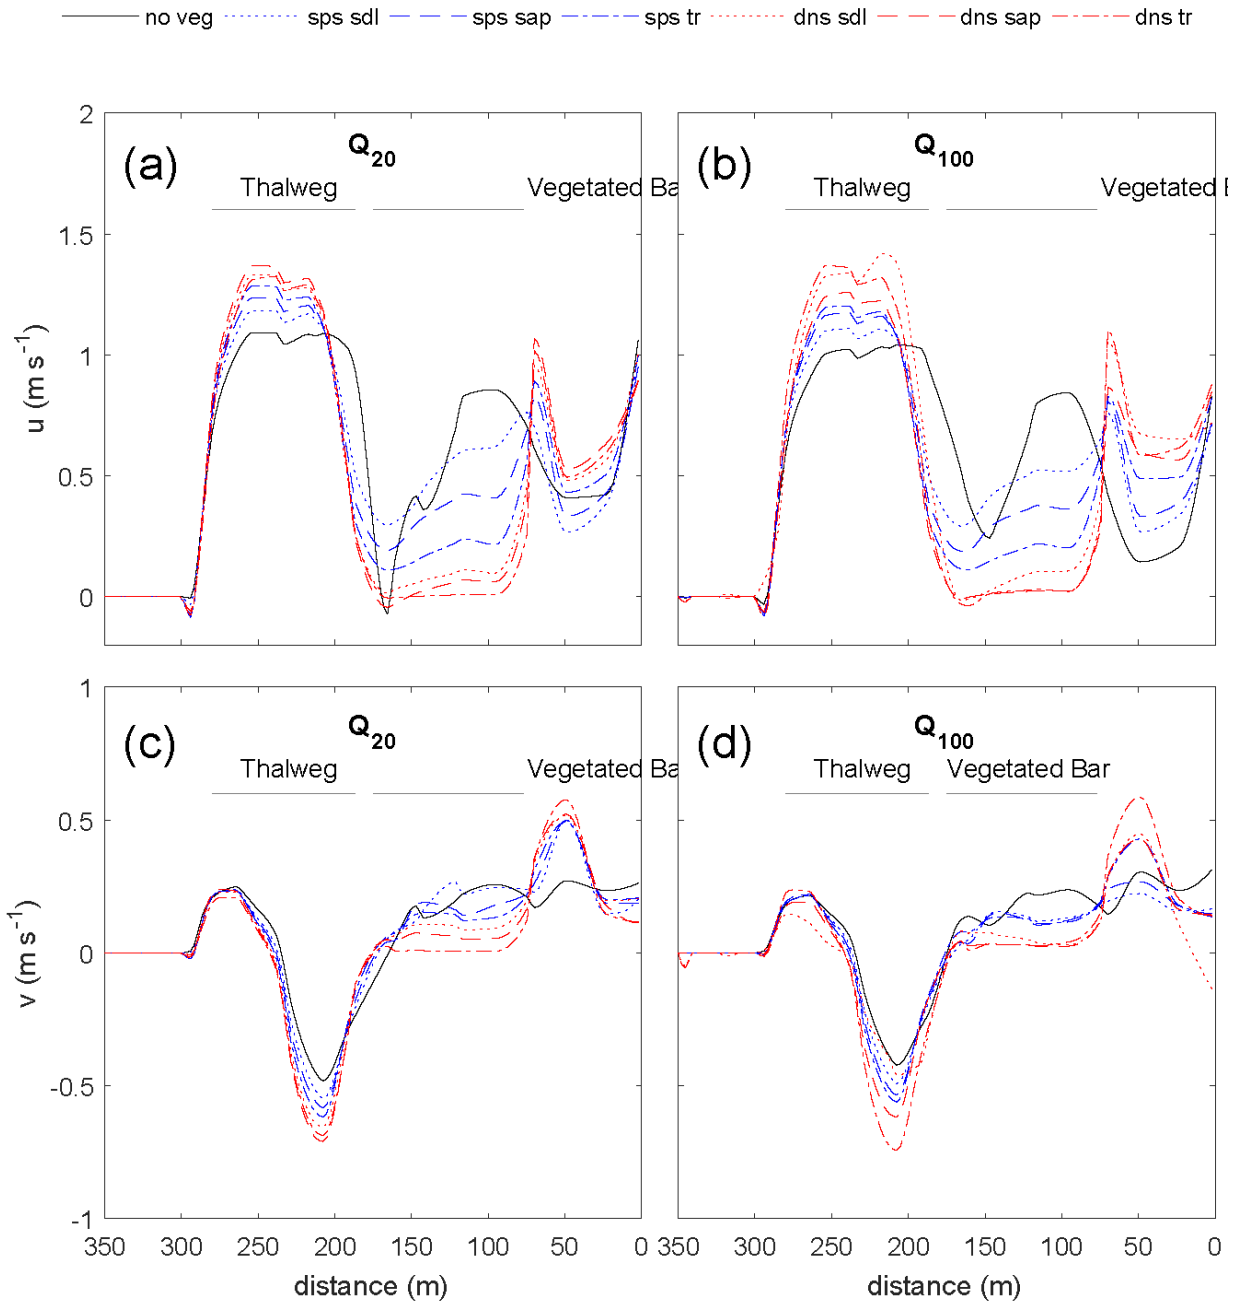

85  
 86 **Figure S2. Effect of the vegetated bar ( $j = 33-75$ ) on the streamwise ( $u$ ; a,b) and stream-normal ( $v$ ; c,d) velocity at the**  
 87 **downstream cross section (XS1) for the  $Q_{20}$  (a,c) and  $Q_{100}$  (b,d) flows, with distance from river right end point (Figure 4).**  
 88 **With increasing discharge, plant size (seedling to young trees) and density,  $u$  is increased and  $v$  decreased within the**  
 89 **thalweg ( $j = 100$ ). Both  $u$  and  $v$  (positive downstream and toward left bank, respectively) are decreased over the bar, and**  
 90 **for the sparse young trees and all dense scenarios increased at the edge of the patch. The results for the  $Q_{20}$  and  $Q_{100}$ ,**  
 91 **shown here, are similar to the  $Q_{10}$  results (Figure 5).**

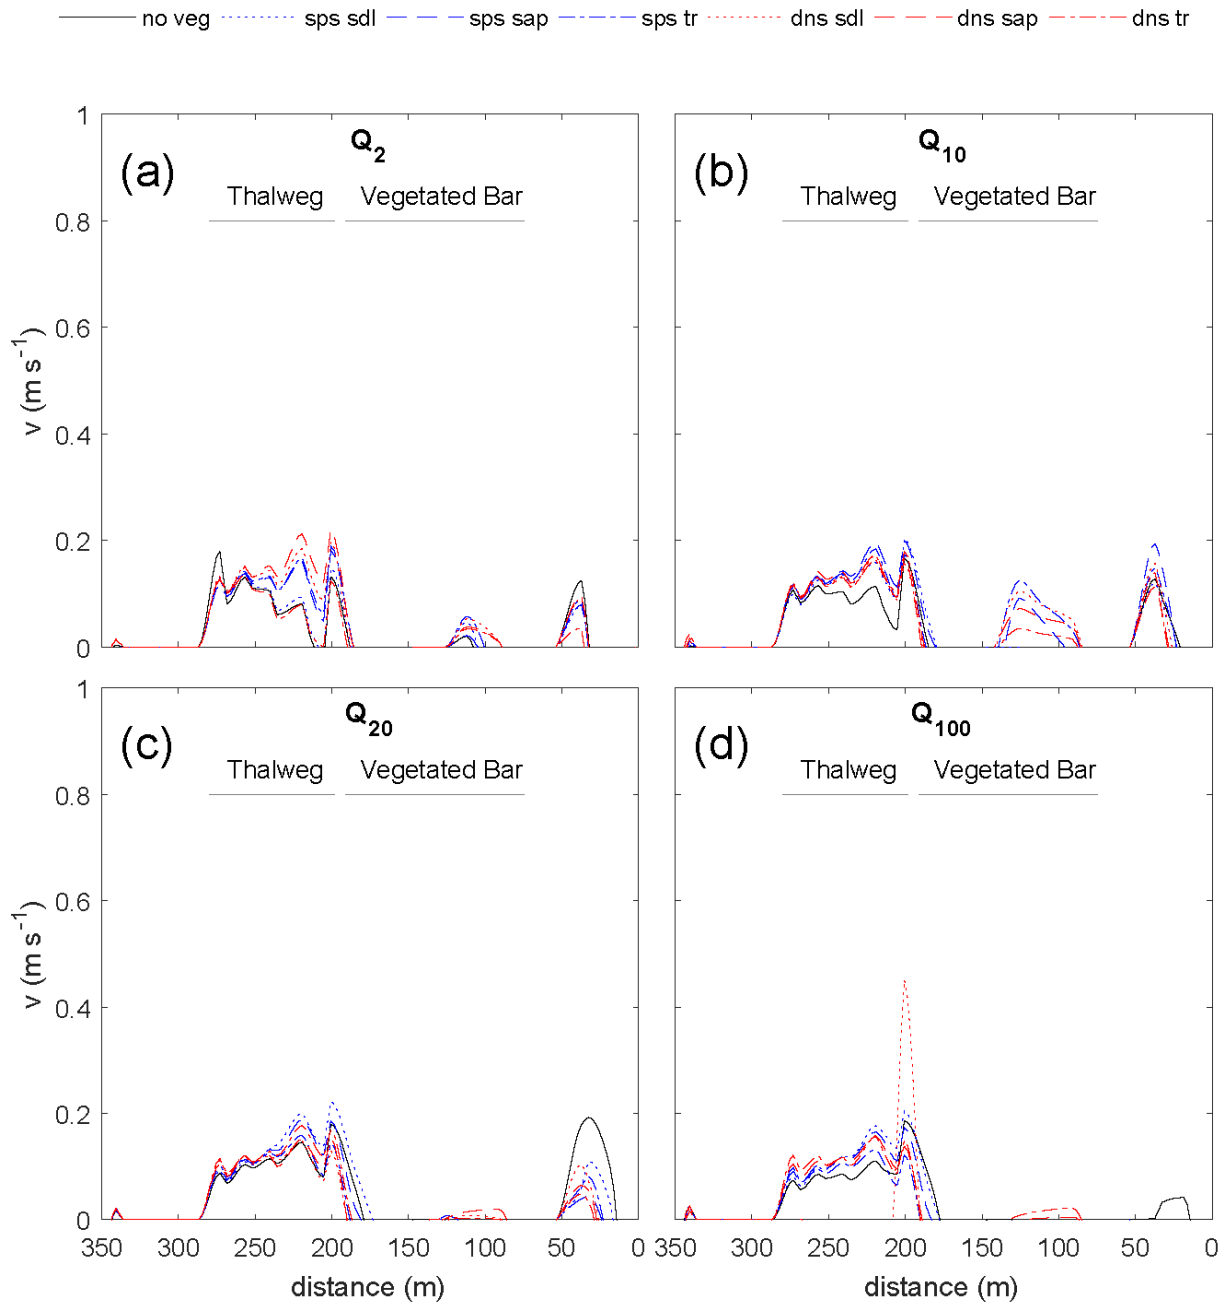

92  
93  
94  
95  
96

Figure S3. Effect of the vegetated bar ( $j = 32-82$ ) on the stream-normal ( $v$ ) velocity at the midstream cross section (XS2) for the  $Q_2$  (a),  $Q_{10}$  (b),  $Q_{20}$  (c), and  $Q_{100}$  (d) flows, with distance from river right end point (Figure 4). In general,  $v$  values are much smaller than  $u$  values at XS2 (see Figure 6), and not substantially influenced by bar vegetation.



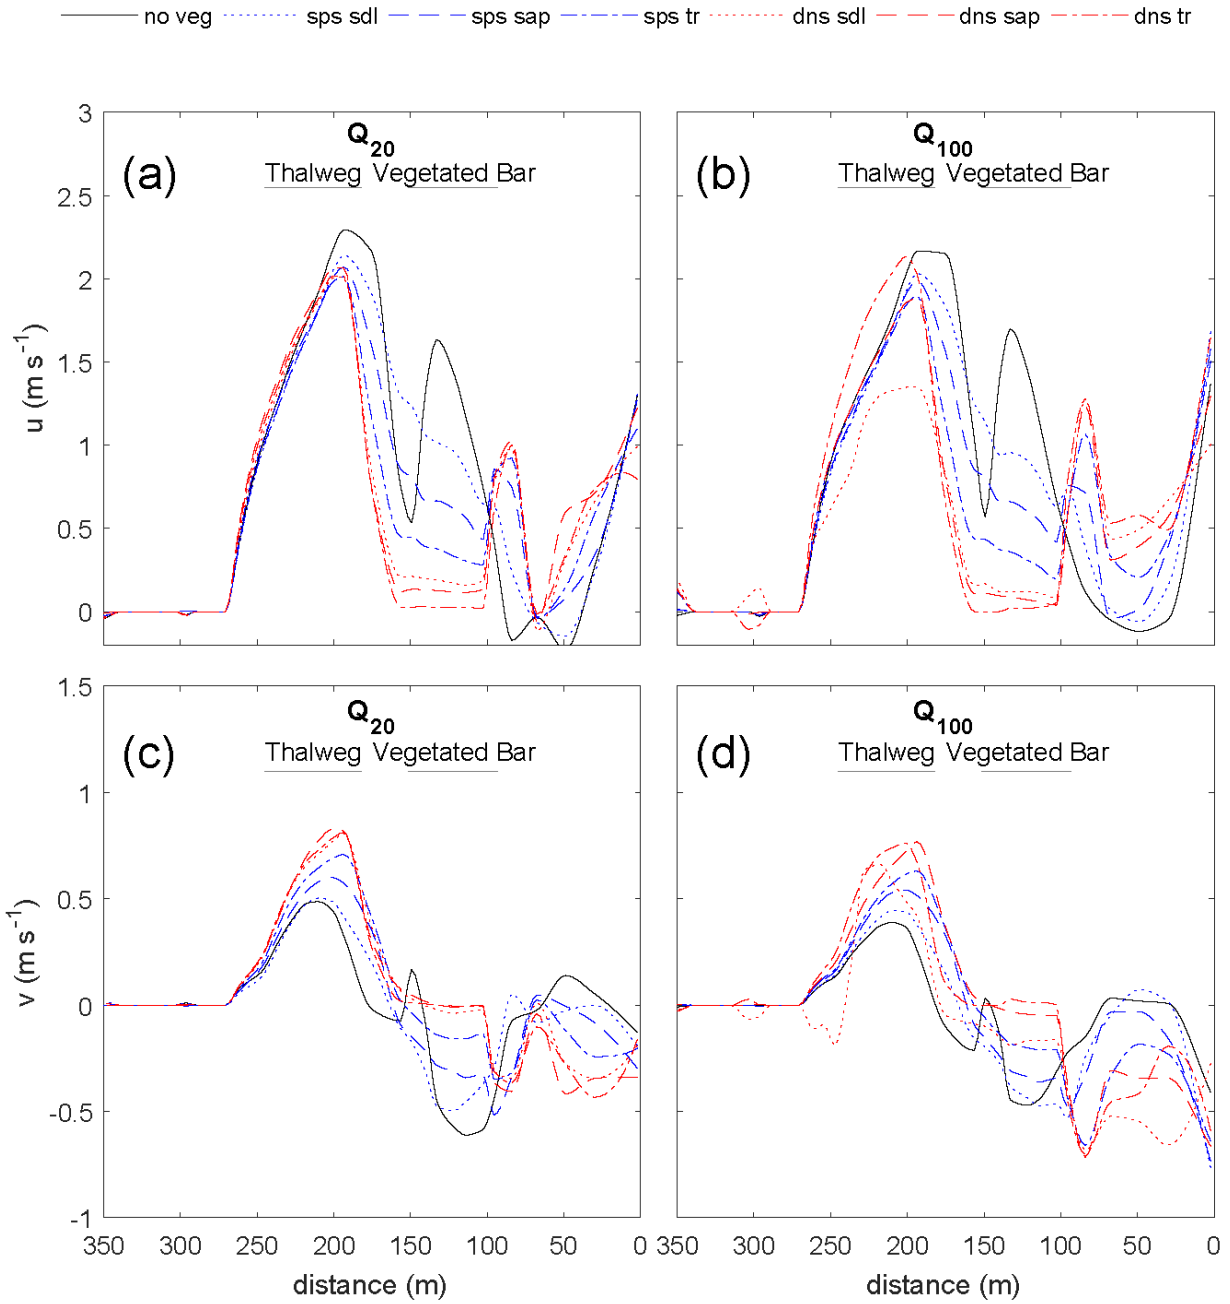

97  
 98 **Figure S4.** Effect of the vegetated bar ( $j = 50-65$ ) on the streamwise ( $u$ ; a,b) and stream-normal ( $v$ ; c,d) velocity at the  
 99 upstream cross section (XS1) for the  $Q_{20}$  (a,c) and  $Q_{100}$  (b,d) flows, with distance from river right end point (Figure 4). In  
 100 the thalweg ( $j = 90$ ) and at the head of the bar,  $u$  is decreased with increasing seedling size and density. For  $Q \geq Q_{10}$ ,  $v$   
 101 became more negative adjacent to the vegetation patch. The results for the  $Q_{20}$  and  $Q_{100}$  are similar to that of the  $Q_{10}$  flow  
 102 (shown in Figure 7).  
 103  
 104  
 105

106 **List of terms**

107  $A_c$  = vegetation frontal area (m<sup>2</sup>)

108

109  $c_{Uz}$  = intercept from regression of  $U$  as a function of  $z$

110  $m_{Uz}$  = slope of regression of  $U$  as a function  $z$

111  $u_*$  = shear velocity

112  $u_{*Uz}$  = shear velocity calculated from regression  $U$  as a function of  $z$

113  $\bar{U}$  = depth-averaged velocity (m s<sup>-1</sup>)

114  $U$  = velocity (m s<sup>-1</sup>)

115  $z_m$  = height above bed corresponding to law-of-wall-predicted average velocity

116  $z_o$  = roughness height (m)

117  $z_{oUz}$  = roughness height (m) determined from regressing  $U$  as a function of  $z$

118  $\kappa$  = von Karman constant

119

120 **References cited**

121

122 Bergeron, N. and Abrahams, A.: Estimating shear velocity and roughness length from velocity profiles, *Water Resour. Res.*, 28(8), 2155–2158, 1992.

123

124 Hemery, G. E., Savill, P. S. and Pryor, S. N.: Applications of the crown diameter–stem diameter relationship for different species of broadleaved trees, *For. Ecol. Manage.*, 215(1–3), 285–294, doi:10.1016/j.foreco.2005.05.016, 2005.

125

126 Koch, B., Heyder, U. and Weinacker, H.: Detection of Individual Tree Crowns in Airborne Lidar Data, *Photogramm. Eng. Remote Sens.*, 72(4), 357–363, doi:10.14358/PERS.72.4.357, 2006.

127

128 Rennie, C. D. and Church, M.: Mapping spatial distributions and uncertainty of water and sediment flux in a large gravel bed river reach using an acoustic Doppler current profiler, *J. Geophys. Res.*, 115(F3), doi:10.1029/2009JF001556, 2010.

129

130 Rennie, C. D. and Millar, R. G.: Measurement of the spatial distribution of fluvial bedload transport velocity in both sand and gravel, *Earth Surf. Process. Landforms*, 29(10), 1173–1193, doi:10.1002/esp.1074, 2004.

131

132 Venditti, J. G., Domarad, N., Church, M. and Rennie, C. D.: The gravel-sand transition: Sediment dynamics in a diffuse extension, *J. Geophys. Res. Earth Surf.*, 120, 1–21,

133

137 doi:10.1002/2014JF003328.Received, 2015.

138

139
